# Supplementary material for: Colitis-Mediated Dysbiosis of the Intestinal Flora and Impaired Vitamin A Absorption Reduce Ovarian Function in Mice
Source: MDPI journal article supplement (doi:10.3390/nu15112425), 2023-05-23
Supplement: s1 [file s1]

**Supplementary Table S1. Evaluation criteria of Disease activity index (DAI) scores**

| DAI score | Weight loss (%)   | Stool condition | Gross bleeding     |
|-----------|-------------------|-----------------|--------------------|
| 0         | None              | Normal          | None               |
| 1         | < 5               | Normal          | None               |
| 2         | 5-10              | Loose stools    | Hemoccult positive |
| 3         | >10 and $\leq$ 20 | Loose stools    | Hemoccult positive |
| 4         | > 20              | Diarrhea        | Severe bleeding    |
