# Supplementary material for: Colitis-Mediated Dysbiosis of the Intestinal Flora and Impaired Vitamin A Absorption Reduce Ovarian Function in Mice
Source: MDPI journal article supplement (doi:10.3390/nu15112425), 2023-05-23
Supplement: s1 [file s1]

**Supplementary Table S3. Antibody information.**

| Primary antibodies |                           |             |
|--------------------|---------------------------|-------------|
| Antibody           | Company <sup>a</sup>      | Cat. Number |
| β-actin            | Cell Signaling Technology | 4970S       |
| StAR               | Abcam                     | ab133657    |
| CYP11A1            | Abcam                     | ab175408    |

  

| Secondary antibodies |                           |             |
|----------------------|---------------------------|-------------|
| Antibody             | Company <sup>a</sup>      | Cat. Number |
| Anti-mouse IgG       | Cell Signaling Technology | 7076S       |
| Anti-rabbit IgG      | Cell Signaling Technology | 7074S       |

<sup>a</sup> Cell Signaling Technology, Beverly, MA, USA.

Abcam, Cambridge, MA, USA
