# Supplementary material for: Colitis-Mediated Dysbiosis of the Intestinal Flora and Impaired Vitamin A Absorption Reduce Ovarian Function in Mice
Source: MDPI journal article supplement (doi:10.3390/nu15112425), 2023-05-23
Supplement: s1 [file s1]

**Supplementary Table S2. Primer sequences used in this study.**

| Genes          | Accession Number | Primer Sequence (5'to3') <sup>a</sup>                      | Product length<br>(bp) |
|----------------|------------------|------------------------------------------------------------|------------------------|
| <i>β-actin</i> | NM_007393.5      | F: GGCTGTATTCCCCTCCATCG<br>R: CCAGTTGGTAACAATGCCATGT       | 154                    |
| <i>Tnf-α</i>   | NM_001278601.1   | F: CCTGGCCTCTCTACCTTGTTG<br>R: AGCCTGGTCACCAAATCAGC        | 100                    |
| <i>Il-1α</i>   | NM_010554.4      | F: GTATGCCTACTCGTCGGGAG<br>R: GGCAACTCCTTCAGCAACAC         | 120                    |
| <i>Il-1β</i>   | NM_008361.4      | F: GTCGCTCAGGGTCACAAGAA<br>R: GTGCTGCCTAATGTCCCCTT         | 155                    |
| <i>Il-6</i>    | NM_031168.2      | F: CTGCAAGAGACTTCCATCCAG<br>R: AGTGGTATAGACAGGTCTGTTGG     | 131                    |
| <i>Zo-1</i>    | NM_001163574.1   | F: GCTTTAGCGAACAGAAGGAGC<br>R: TTCATTTTTCCGAGACTTCACCA     | 156                    |
| <i>Aldh1a1</i> | NM_013467.4      | F: AGGCCCTCAGATTGACAAGGAACA<br>R: AACACTGTGGGCTGCACAAAGAAG | 135                    |
| <i>Rdh10</i>   | NM_133832.3      | F: ATGGTTCGCCACATCTACCG<br>R: CTCCTCACCTTTTCCAGCTTGC       | 72                     |
| <i>Cyp26a1</i> | NM_007811        | F: GCACAAGCAGCGAAGAAGGTGAT<br>R: ACTGCTCCAGACAACTGCTGACTT  | 103                    |
| <i>Cyp26b1</i> | NM_175475        | F: GGC GGCTACCGCACTGT<br>R: TGTCTCGGATGCTATCATGACACT       | 87                     |
| <i>Rarβ</i>    | NM_001289762     | F: GCACTGACGCCATAGTGGTA<br>R: CACCATCTCCACTTCCTCCT         | 88                     |

<sup>a</sup> F: Forward primer; R: Reverse primer.
