# Supplementary material for: Colitis-Mediated Dysbiosis of the Intestinal Flora and Impaired Vitamin A Absorption Reduce Ovarian Function in Mice
Source: MDPI journal article supplement (doi:10.3390/nu15112425), 2023-05-23
Supplement: s1 [file s1]

**A**

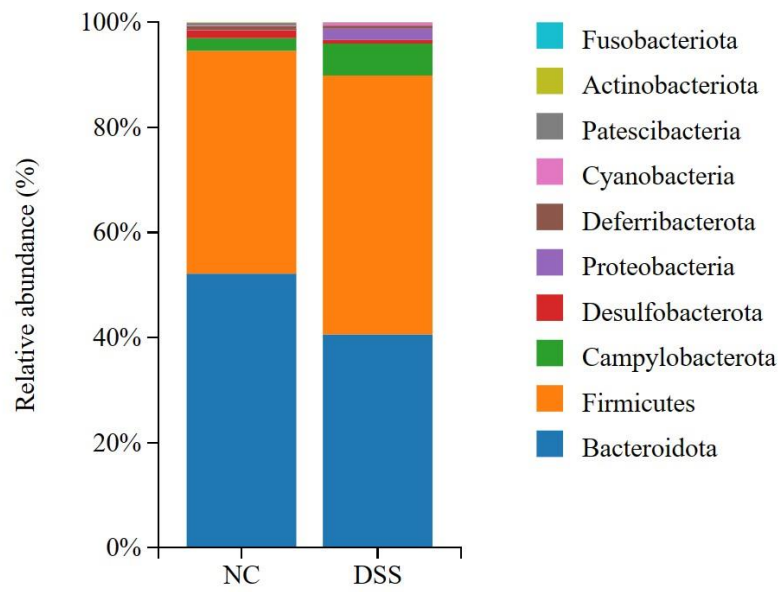

**B**

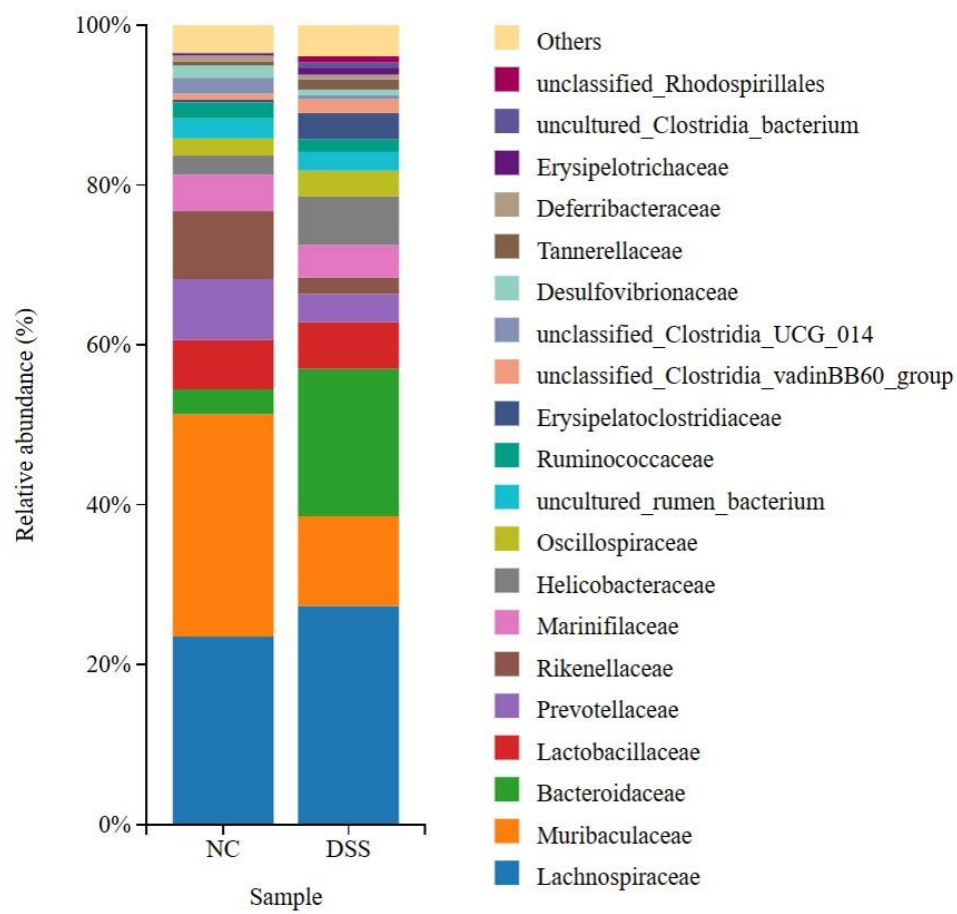

C

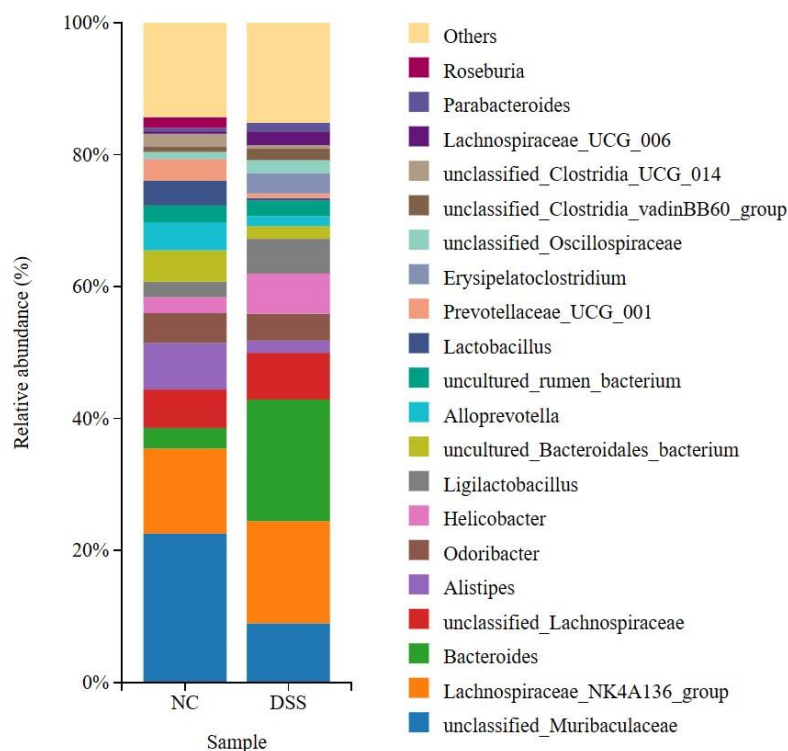

D

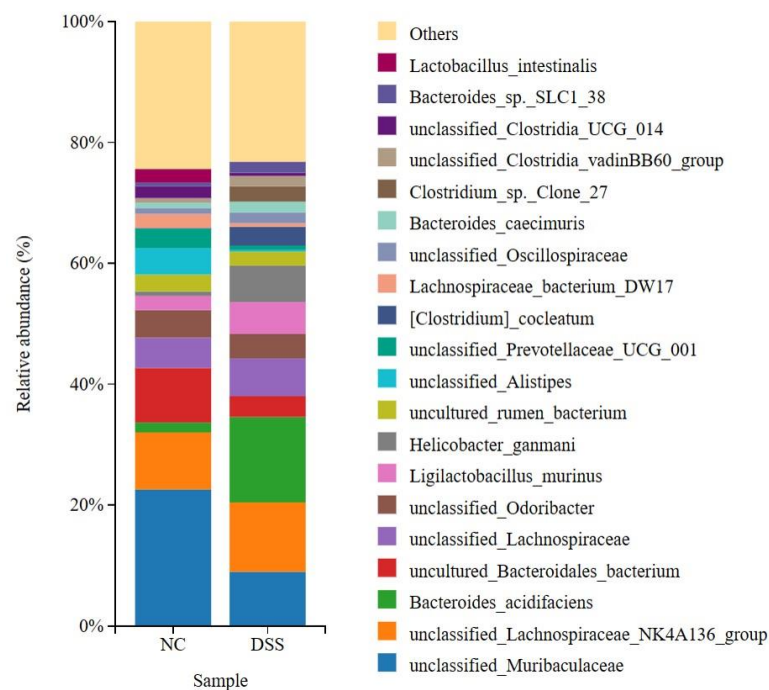

**Supplementary Figure S1. Abundance changes of the intestinal flora at the phylum, family, genus, and species levels with or without DSS treatment.** DSS treatment altered the abundance of the intestinal flora at the phylum (A), family (B), genus (C), and species (D) levels.
